# Supplementary material for: A simple SEIR-V model to estimate COVID-19 prevalence and predict SARS-CoV-2 transmission using wastewater-based surveillance data
Source: PubMed Central journal article supplement — medRxiv. 2022 Jul 18:2022.07.17.22277721. Preprint. [Version 1] doi: 10.1101/2022.07.17.22277721 (PMC9327624; doi:10.1101/2022.07.17.22277721), 2022-07-18
Supplement: NIHPP2022.07.17.22277721V1-supplement-1.pdf [file NIHPP2022.07.17.22277721V1-supplement-1.pdf]

586

587

588

589

590

591 **Supplementary Figures**

592

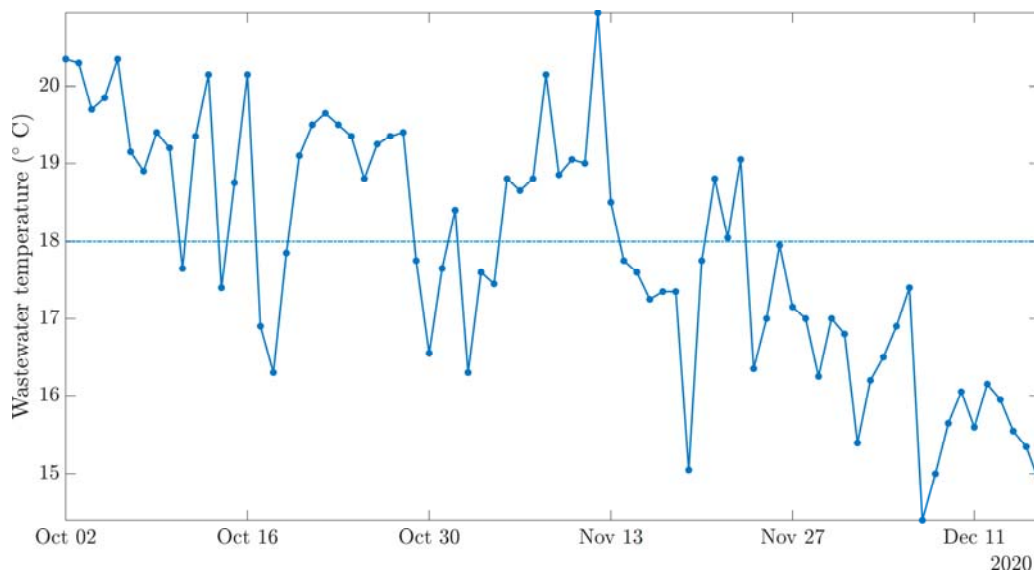

593

594 **Figure S1. Wastewater temperature data during the model fitting period.** Over the fitting  
595 duration (from Oct 02 to Dec 16, 2020), the average temperature is relatively constant at around  
596 18 degrees Celsius.

597

598

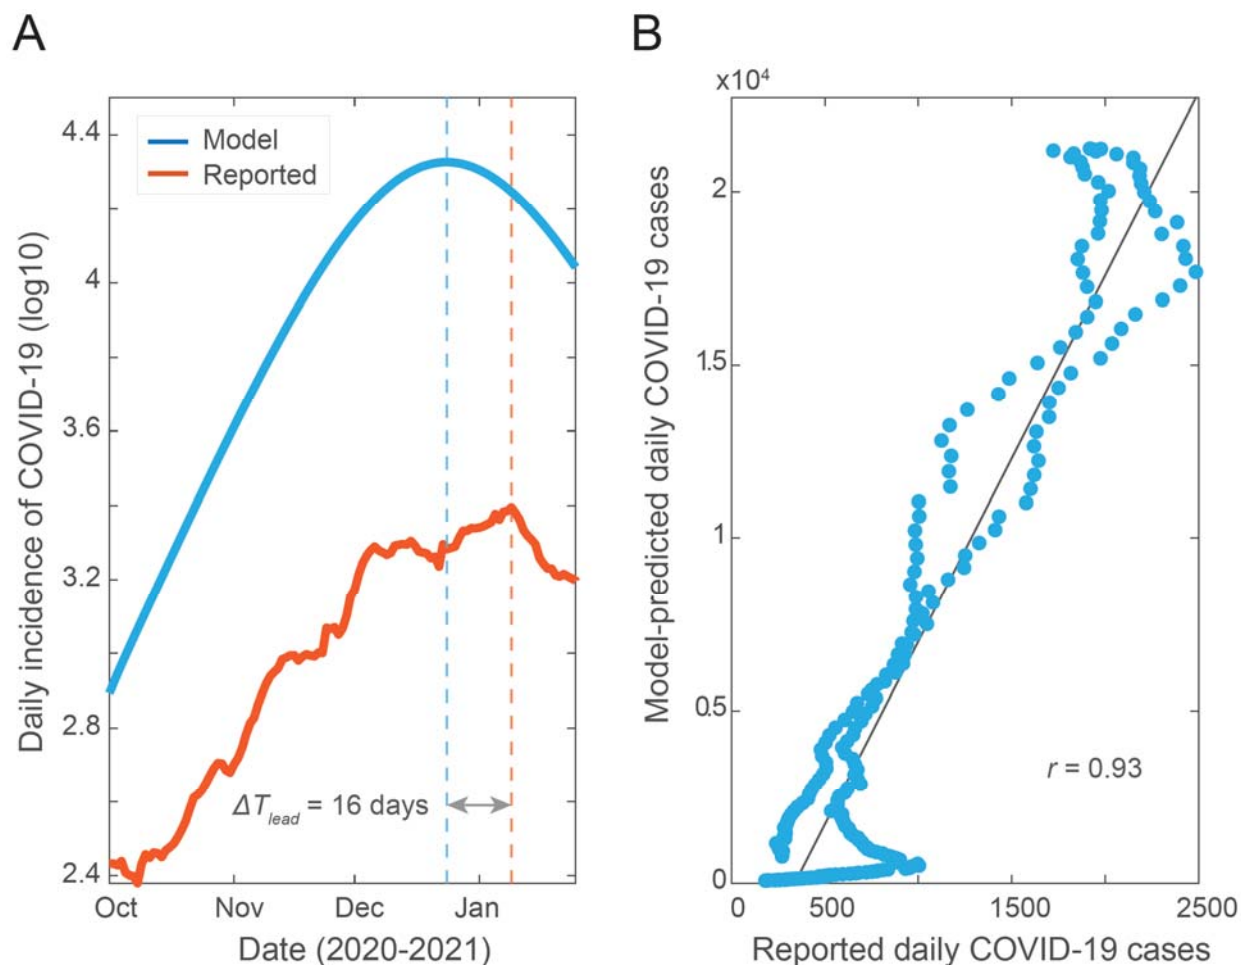

599

600 **Figure S2. Predicted cases and correlation plot for the SEIR-V model with temperature**  
601 **effect.** The wastewater data covers the second wave of pandemic (October 2, 2020 to January 25,  
602 2021). (A) Model simulation of the true number of COVID-19 cases and clinically reported  
603 cases. (B) Correlation between the number of model-predicted cases and reported cases (daily).

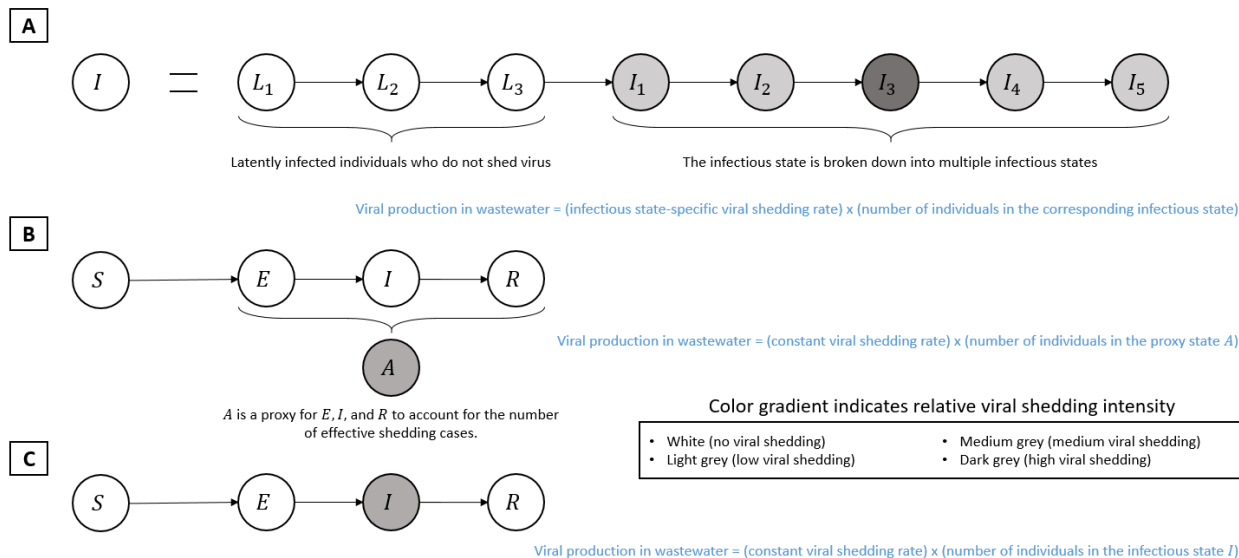

604

605 **Figure S3. Comparison of underlying frameworks for modeling of wastewater surveillance data.** Two general  
 606 methods have been reported to connect viral concentration in wastewater to epidemic model. (A) is representative of  
 607 Brouwer et al. and Nourbakhsh et al. (Brouwer et al., 2022; Nourbakhsh et al., 2022), (B) is representative of  
 608 Proverbio et al. (Proverbio et al., 2022), and (C) is the proposed model framework.
